# Supplementary material
Source: HighWire-hosted journal article supplement (https://cmaj.ca/highwire/filestream/150661/field_highwire_adjunct_files/5/231419-res-6-at.pdf)
Supplement: 231419-res-6-at.pdf [file 231419-res-6-at.pdf]

**Appendix VI: Top 10 causes of death for decedents with and without opioid use disorder (OUD)**

| No OUD (n=668,640)                                                       | %    | OUD (n=11,200)                                                           | %    |
|--------------------------------------------------------------------------|------|--------------------------------------------------------------------------|------|
| Neoplasms                                                                | 27.6 | External Causes of Injury and Poisoning                                  | 26.7 |
| Diseases of the Circulatory System                                       | 25.4 | Diseases of the Circulatory System                                       | 13.6 |
| Diseases of the Respiratory System                                       | 10.8 | Neoplasms                                                                | 13.0 |
| Mental Disorders                                                         | 8.6  | Injury and Poisoning                                                     | 11.3 |
| External Causes of Injury and Poisoning                                  | 5.6  | Mental Disorders                                                         | 10.0 |
| Diseases of the Digestive System                                         | 4.1  | Diseases of the Respiratory System                                       | 7.8  |
| Diseases of the Nervous System and Sense<br>Organs                       | 3.9  | Diseases of the Digestive System                                         | 4.6  |
| Diseases of the Genitourinary System                                     | 3.4  | Infectious and Parasitic Diseases                                        | 3.8  |
| Endocrine, Nutritional, and Metabolic<br>Diseases and Immunity Disorders | 3.0  | Endocrine, Nutritional, and Metabolic<br>Diseases and Immunity Disorders | 3.0  |
| Symptoms, Signs, and Ill-Defined<br>Conditions                           | 2.8  | Symptoms, Signs, and Ill-Defined<br>Conditions                           | 2.7  |
